# Supplementary material for: Salt-assisted activation of n → π* electronic transition in orange carbon nitride for enhanced visible-light-driven H 2 generation
Source: Royal Society of Chemistry journal article supplement (doi:10.1039/d4ta07246d), 2024-12-03
Supplement: d4ta07246d1.pdf [file d4ta07246d1.pdf]

## Supporting Information

### **Salt-assisted activation of $n \rightarrow \pi^*$ electronic transition in orange carbon nitride for enhanced visible-light-driven $H_2$ generation**

Lin Lei,<sup>a</sup> Yongbo Fan,<sup>b</sup> Yuxin Jia,<sup>c</sup> Huiqing Fan,<sup>\*a</sup> Weijia Wang<sup>\*a</sup> and Haitao Huang<sup>\*b</sup>

<sup>a</sup> *State Key Laboratory of Solidification Processing, School of Materials Science and Engineering, Northwestern Polytechnical University, Xi'an 710072, China*

<sup>b</sup> *Department of Applied Physics and Research Institute for Smart Energy, The Hong Kong Polytechnic University, Hong Kong, China*

<sup>c</sup> *School of Electronics and Information, Northwestern Polytechnical University, Xi'an 710072, China*

\*Corresponding author: Email: [hqfan3@163.com](mailto:hqfan3@163.com) (H. Fan)

[weijia.wang@nwpu.edu.cn](mailto:weijia.wang@nwpu.edu.cn) (W. Wang)

[aphhuang@polyu.edu.hk](mailto:aphhuang@polyu.edu.hk) (H. Huang)

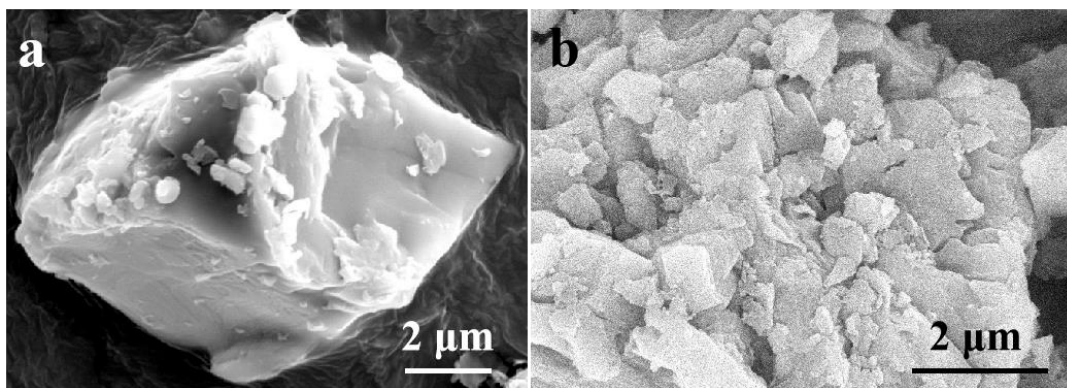

Fig. S1 SEM images of (a) NaCl particle and (b) melem.

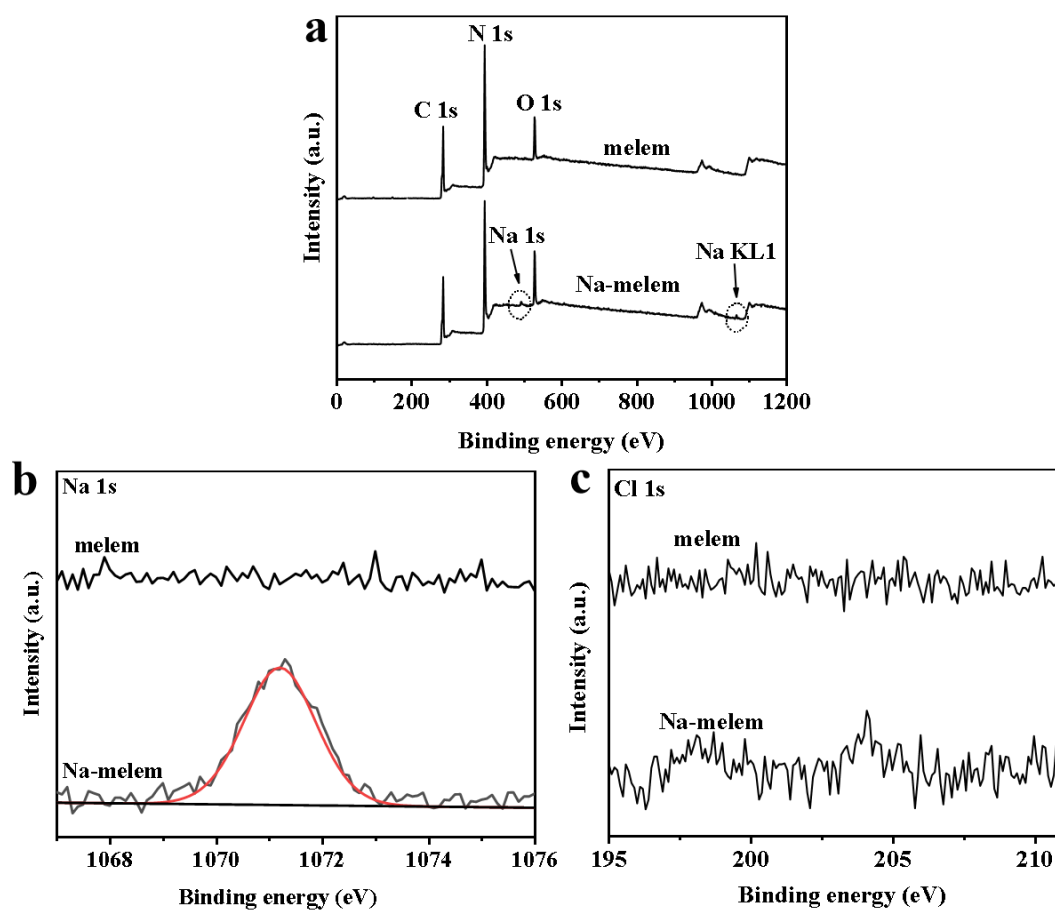

Fig. S2 (a) XPS survey, (b) Na 1s, and (c) Cl 1s spectra of melem and Na-melem.

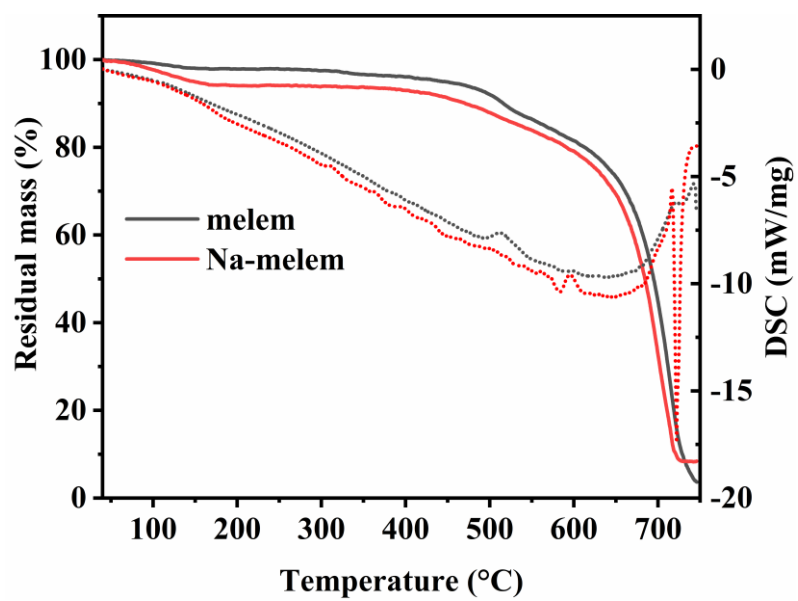

Fig. S3 TG-DSC curves of melem and Na-melem.

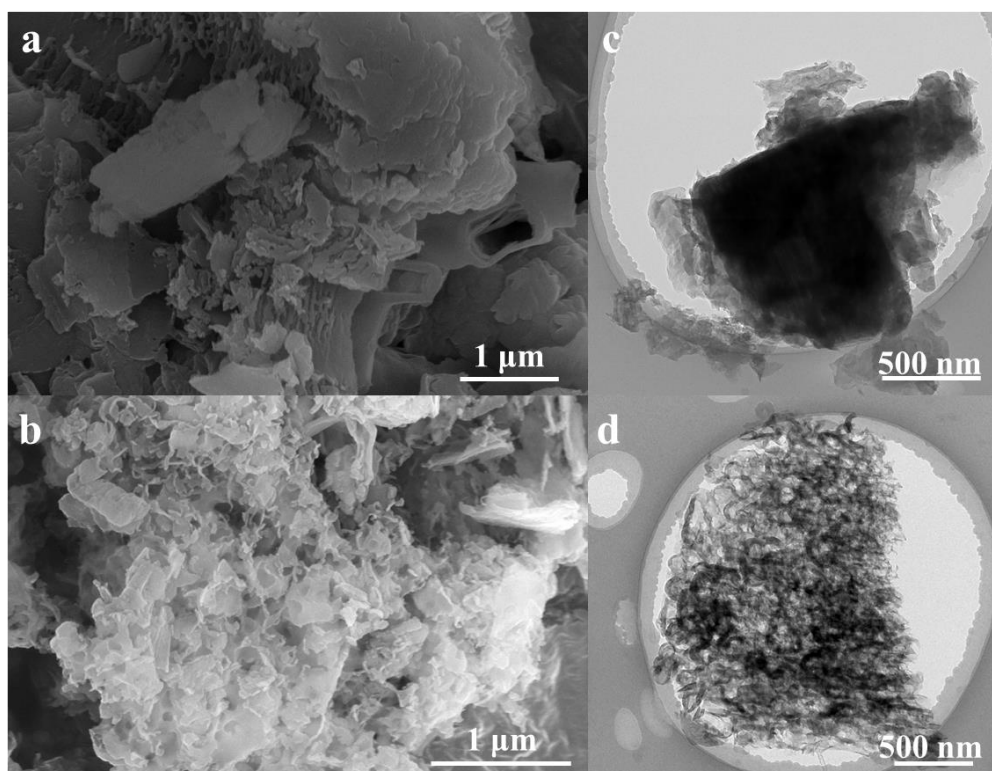

Fig. S4 SEM images of (a) PCN and (b) MCN. TEM images of (c) PCN and (d) MCN.

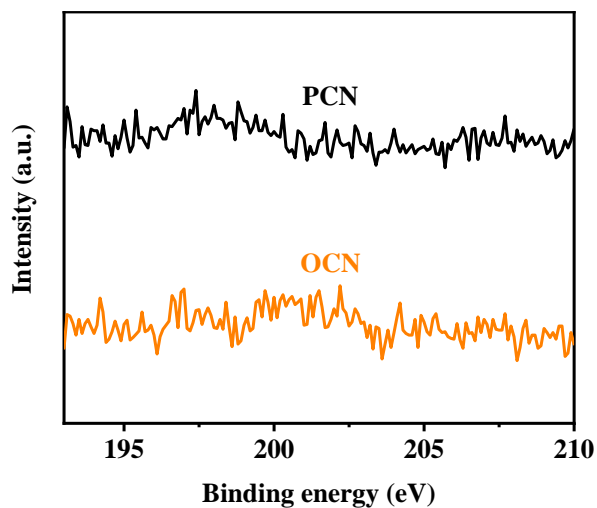

Fig. S5 XPS Cl 1s spectra of PCN and OCN.

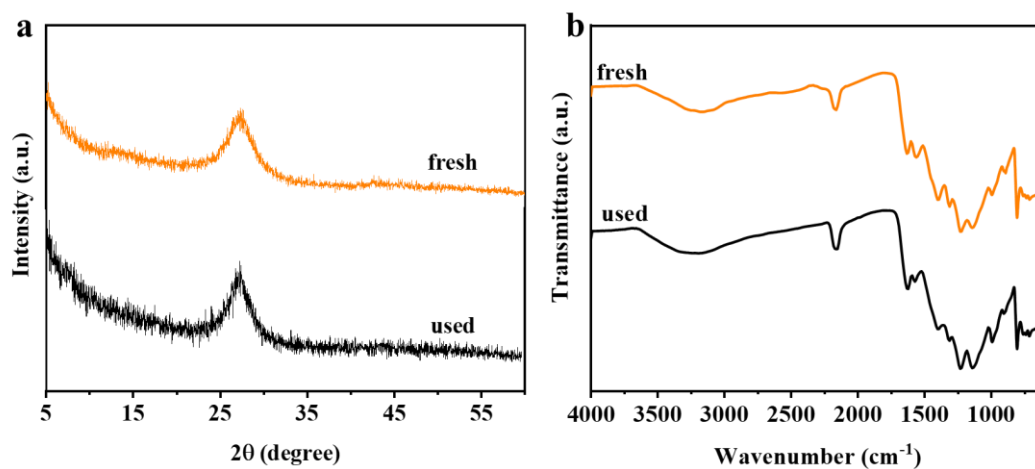

Fig. S6 (a) XRD patterns and (b) FTIR spectra of OCN before and after photocatalytic reaction.

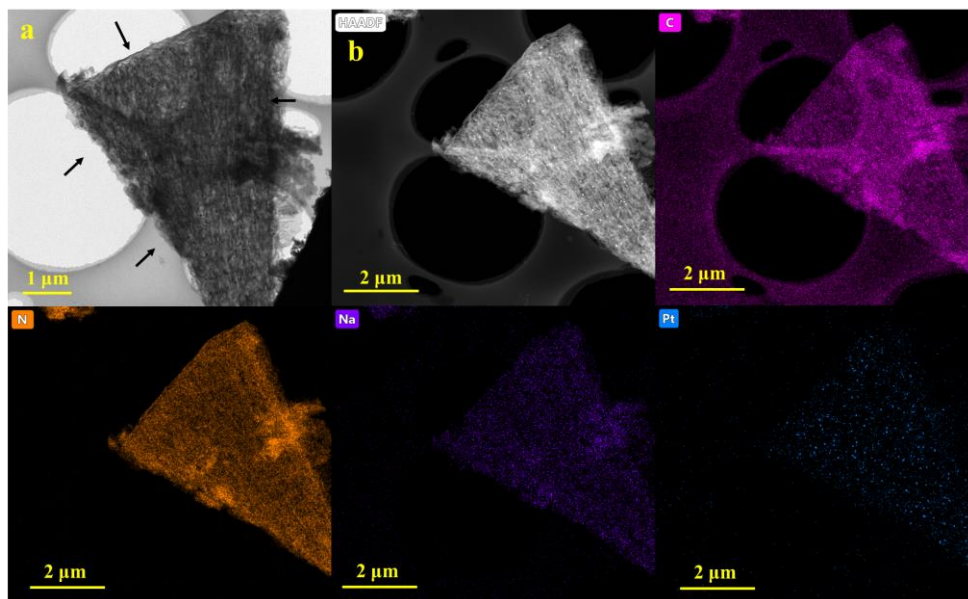

**Fig. S7** (a) TEM image and (b) HAADF image with corresponding elemental mappings of C, N, Na, and Pt distribution of OCN after photocatalytic reaction.

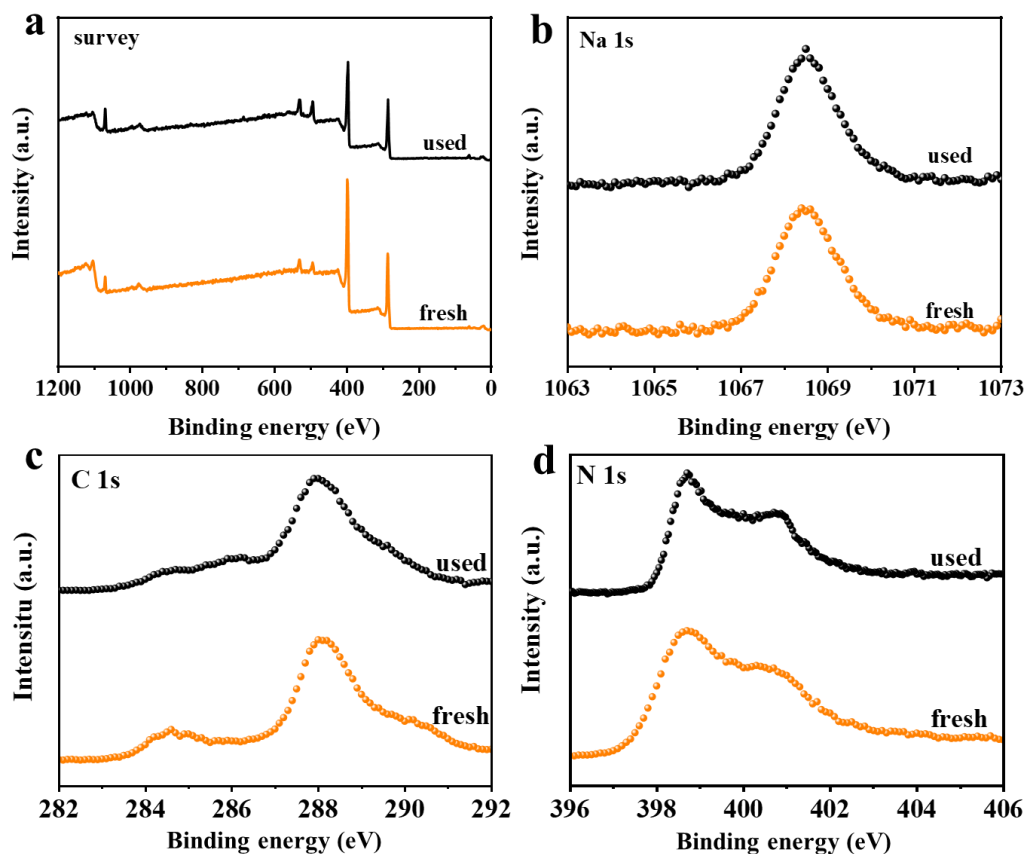

**Fig. S8** (a) XPS survey spectra, high-resolution (b) Na 1 s, (c) C 1 s, and (d) N 1 s spectra of OCN before and after photocatalytic reaction.

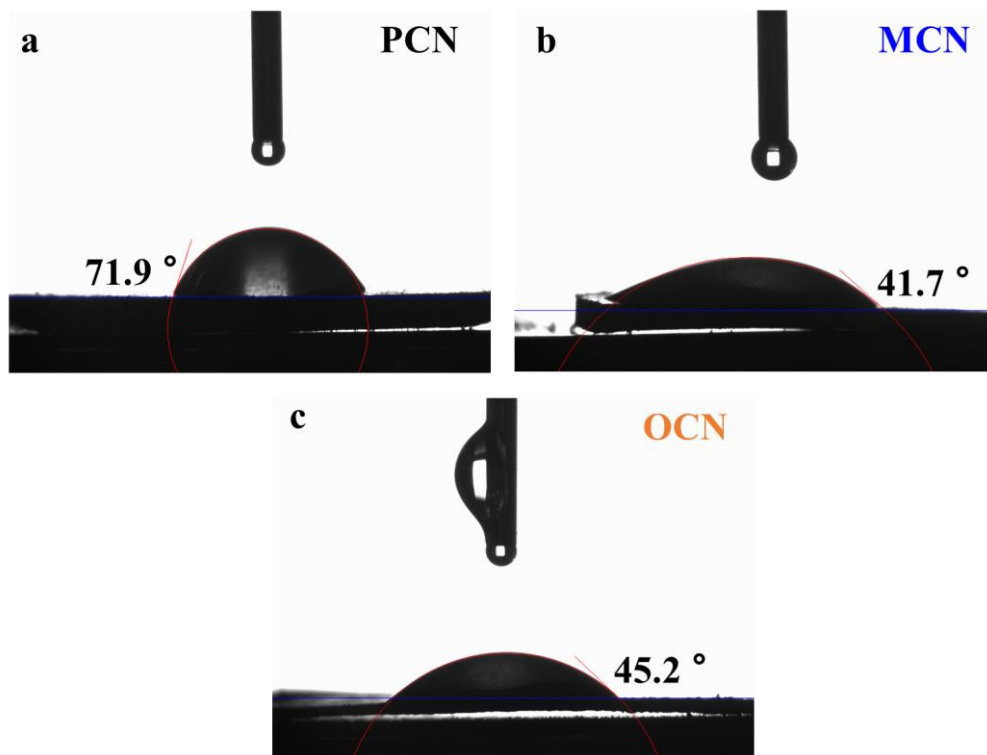

**Fig. S9** The static water contact-angle measurement of (a) PCN, (b) MCN, and (c) OCN.

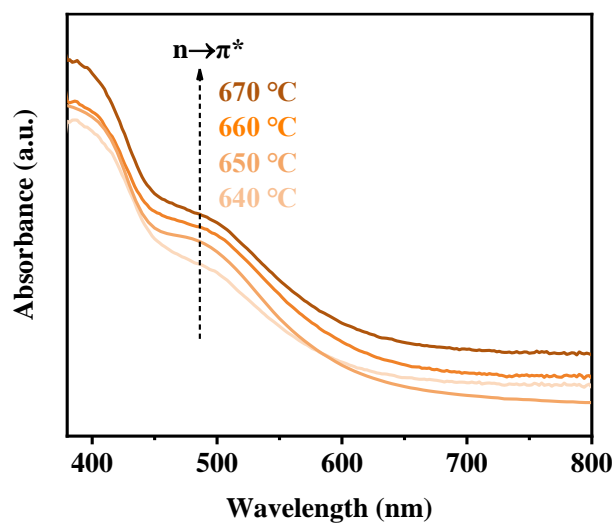

**Fig. S10** UV-Vis DRS spectra of OCN synthesized at different temperatures.

**Table S1** The average PL lifetimes and relative percentages of photoinduced charge carriers in PCN, MCN, and OCN.

| Sample | $\tau_1$ (ns) | $A_1$ (%) | $\tau_2$ (ns) | $A_2$ (%) | $\tau_{av}$ (ns) |
|--------|---------------|-----------|---------------|-----------|------------------|
| PCN    | 1.50          | 72.6      | 8.31          | 27.4      | 6.11             |
| MCN    | 0.77          | 78.6      | 5.25          | 21.4      | 3.68             |
| OCN    | 0.45          | 96.6      | 5.14          | 3.4       | 1.80             |

<sup>a)</sup> The fitted PL lifetime decay curves  $[I(t)-t]$  are based on biexponential decay function (Eq. 1).

$$I(t) = A_1 \exp(-t/\tau_1) + A_2 \exp(-t/\tau_2) \quad (1)$$

where  $\tau_1$  and  $\tau_2$  are the lifetimes of radiative and nonradiative decay components,  $A_1$  and  $A_2$  are the amplitudes of radiative and nonradiative decay components.

The average PL lifetime decay ( $\tau_{av}$ ) is calculated by Eq. 2.

$$\tau_{av} = (A_1 \tau_1^2 + A_2 \tau_2^2) / (A_1 + A_2) \quad (2)$$

**Table S2** Comparison of the HER and AQE from some Na<sup>+</sup>-doped carbon nitride photocatalysts reported in recent literature.

| Photocatalysts                                         | Conditions                    | HER ( $\mu\text{mol h}^{-1} \text{g}^{-1}$ ) | AQE<br>$\lambda=420 \text{ nm}$ | Refs.     |
|--------------------------------------------------------|-------------------------------|----------------------------------------------|---------------------------------|-----------|
| honeycomb-like<br>g-C <sub>3</sub> N <sub>4</sub>      | 3 wt% Pt,<br>25 % lactic acid | 459 ( $\lambda > 420 \text{ nm}$ )           | 2.2 %                           | 1         |
| Na <sup>+</sup> -doped g-C <sub>3</sub> N <sub>4</sub> | 1 wt% Pt,<br>10 % TEOA        | 374 ( $\lambda > 400 \text{ nm}$ )           | /                               | 2         |
| g-C <sub>3</sub> N <sub>4</sub> -D                     | 1 wt% Pt,<br>10 % lactic acid | 667.8 ( $\lambda > 420 \text{ nm}$ )         | 1.8 %                           | 3         |
| MC-CN                                                  | 3 wt% Pt,<br>10 % TEOA        | 215.8 ( $\lambda > 420 \text{ nm}$ )         | 1.56 %                          | 4         |
| NaCCNB                                                 | 1 wt% Pt,<br>10 % TEOA        | 758 ( $\lambda > 420 \text{ nm}$ )           | 1.03 %                          | 5         |
| g-C <sub>3</sub> N <sub>4</sub> -Na                    | 3 wt% Pt,<br>/                | 37.2 ( $\lambda > 420 \text{ nm}$ )          | /                               | 6         |
| PC-CN0.1                                               | 1 wt% Pt,<br>10 % lactic acid | 1010 (420 nm)                                | /                               | 7         |
| OCN                                                    | 1 wt% Pt,<br>10 % TEOA        | 1043 ( $\lambda > 420 \text{ nm}$ )          | 3.17 %                          | This work |

## Reference

1. F. Yang, D. Liu, Y. Li, L. Cheng and J. Ye, *Appl. Catal. B Environ.*, 2019, **240**, 64-71.
2. J. Jiang, S. Cao, C. Hu and C. Chen, *Chinese J. Catal.*, 2017, **38**, 1981-1989.
3. Y. Shao, X. Hao, S. Lu and Z. Jin, *Chem. Eng. J.*, 2023, **454**, 140123.
4. B. Zhai, H. Li, G. Gao, Y. Wang, P. Niu, S. Wang and L. Li, *Adv. Funct. Mater.*, 2022, **32**, 2207375.
5. W. Wang, Z. Shu, J. Zhou, D. Meng, Z. Zhao and T. Li, *J. Mater. Chem. A*, 2020, **8**, 6785-6794.
6. H. Luo, Y. Jia, Z. Xie and W. Shi, *Chem. Eng. Sci.*, 2024, **299**, 120409.
7. X. Wu, H. Ma, W. Zhong, J. Fan and H. Yu, *Appl. Catal. B Environ.*, 2020, **271**, 118899.
